# Supplementary material
Source: ML conference proceedings conference paper supplement (https://openaccess.thecvf.com/content/ICCV2025/html/Svitov_BillBoard_Splatting_BBSplat_ICCV_2025_paper.html)
Supplement: Supplementary file 1 [file suppmat.pdf › suppmat.pdf]

# BillBoard Splatting (BBSplat): Learnable Textured Primitives for Novel View Synthesis

## Supplementary Material

|           | 10     | 100    | 500    | 1000   | 1500   |
|-----------|--------|--------|--------|--------|--------|
| PSNR↑     | 25.95  | 25.96  | 25.99  | 25.92  | 25.92  |
| SSIM↑     | 0.8800 | 0.8798 | 0.8798 | 0.8798 | 0.8795 |
| LPIPS↓    | 0.1365 | 0.1375 | 0.1379 | 0.1392 | 0.1396 |
| Size(MB)↓ | 139    | 122    | 102    | 92     | 87     |

Table 6. **Selecting  $\sigma$  threshold value.** We search for the best  $\sigma$  threshold in Equation (9) using “Truck” scene from the Tanks&Temples dataset.

|           | $8^2 \times 640K$ | $16^2 \times 160K$ | $32^2 \times 40K$ | $64^2 \times 10K$ |
|-----------|-------------------|--------------------|-------------------|-------------------|
| PSNR↑     | 26.04             | 25.99              | 25.28             | 23.34             |
| SSIM↑     | 0.8807            | 0.8798             | 0.8662            | 0.8000            |
| LPIPS↓    | 0.1393            | 0.1379             | 0.1505            | 0.2382            |
| Size(MB)↓ | 207               | 102                | 82                | 68                |

Table 7. **Selecting texture size and number of primitives.** We search for best texture size and primitives number for the fixed parameters amount (4 channels x 40.96M). We evaluate metrics using the “Truck” scene from the Tanks&Temples dataset.

## 6. Implementation details

In this section, we provide more details on the method’s implementation. In the following subsections, we describe the implementation of backpropagation for the bilinear texture sampling with billboard position adjustment and discuss the choice of hyper-parameters to train billboard splatting.

### 6.1. Texture sampling

We leverage *bilinear sampling* to get texture values from  $T_i^{\text{RGB}}$  and  $T_i^\alpha$  in the  $\mathbf{u} = (u, v)$  point of a billboard. Our implementation utilizes GPU programmed with CUDA to accelerate sampling and loss backpropagation to the texture. We based our implementation on the PyTorch[41] CUDA code for bilinear sampling and integrated it into 2DGS CUDA implementation as described below.

In Algorithm 1, we provide pseudo-code for the bilinear sampling gradients backpropagation. The algorithm accepts the gradient value that should be distributed among neighboring texels,  $(u, v)$  coordinate of the billboard point where the gradient is calculated, corresponding source texture, and output tensor to store texture gradients. The function redistributes and stores weighted values of the gradient in four neighboring texels and calculate the gradient  $dL/d\mathbf{u}$  with respect to point  $(u, v)$  position.

In Algorithm 2, we demonstrate how we prepare input parameters for Algorithm 1 to get  $dL/d\mathbf{u}$  values based on RGB texture and alpha map. Calculated  $dL/d\mathbf{u}$  value is

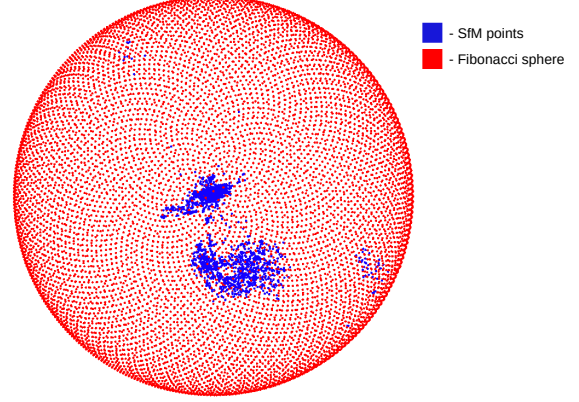

Figure 6. **Sky-sphere around the scene.** We sample additional points on the sphere around all SfM points with the Fibonacci algorithm [16].

then used to adjust billboard position and rotation. The proposed implementation can be easily integrated with the 2DGS approach, which we encapsulate here as subprogram  $\mathcal{F}$ . The function  $\mathcal{F}$  encapsulates gradients calculation for transformation matrix  $\Sigma$  encoding translation and rotation of the plane.

### 6.2. Hyper-parameters

We apply learning rate exponential decay for billboards position from  $lr_\mu = 1.6e-4$  to  $lr_\mu = 1.6e-6$  with 0.01 multiplier. To optimize spherical harmonics and scales we set  $lr_{\text{SH}} = lr_s = 5e-3$  while using smaller learning rate for rotation  $lr_r = 1e-3$ .

We select  $\sigma$  threshold value in Equation (9) based on the metrics provided in Table 6. The  $\sigma$  threshold is used to determine the minimum billboard visibility from which we start regularizing its textures. We set  $\sigma = 500$  as it provides the best PSNR value and achieves the best trade-off between other metrics and storage space. Over-regularization results in more billboards having Gaussian distributed transparency, which leads to more compact storing of them but reduces NVS quality. Under-regularization allows to achieve higher SSIM and LPIPS at the cost of storage space and inference speed.

Table 7 shows metrics for different texture sizes and number of billboards. We select texture size to be the power of two (8, 16, 32, 64) as it is more suitable for processing with GPU, and set the corresponding number of billboards to result in 40.96M parameters for one texture channel to

---

**Algorithm 1** Function for bilinear gradient redistribution

---

```
function BILINEAR( $\frac{dL}{d\omega}, (u, v), T, \frac{dL}{dT}$ )  
   $x = ((u + 1)/2)(T_S - 1)$   
   $y = ((v + 1)/2)(T_S - 1)$   
  
   $ne_x = \lfloor x \rfloor + 1$     $se_x = \lfloor x \rfloor + 1$     $sw_x = \lfloor x \rfloor$   
   $ne_y = \lfloor y \rfloor$       $se_y = \lfloor y \rfloor + 1$     $sw_y = \lfloor y \rfloor + 1$   
  
   $nw = (se_x - x)(se_y - y)$     $ne = (x - sw_x)(sw_y - y)$   
   $sw = (ne_x - x)(y - ne_y)$     $se = (x - nw_x)(y - nw_y)$   
  
  Redistribute gradients  
   $\frac{dL}{dT}[nw_x, nw_y] = \frac{dL}{d\omega} \cdot nw$   
   $\frac{dL}{dT}[ne_x, ne_y] = \frac{dL}{d\omega} \cdot ne$   
   $\frac{dL}{dT}[sw_x, sw_y] = \frac{dL}{d\omega} \cdot sw$   
   $\frac{dL}{dT}[se_x, se_y] = \frac{dL}{d\omega} \cdot se$   
  
  Calculate position gradient  
   $g_x = -T[nw_x, nw_y](se_y - y)\frac{dL}{d\omega}$   
   $g_y = -T[nw_x, nw_y](se_y - x)\frac{dL}{d\omega}$   
   $g_x += T[ne_x, ne_y](sw_y - y)\frac{dL}{d\omega}$   
   $g_y -= T[ne_x, ne_y](x - sw_x)\frac{dL}{d\omega}$   
   $g_x -= T[sw_x, sw_y](y - ne_y)\frac{dL}{d\omega}$   
   $g_y += T[sw_x, sw_y](ne_x - x)\frac{dL}{d\omega}$   
   $g_x += T[se_x, se_y](y - nw_y)\frac{dL}{d\omega}$   
   $g_y += T[se_x, se_y](x - nw_x)\frac{dL}{d\omega}$   
  
   $g_x = g_x(T_S - 1)/2$     $g_y = g_y(T_S - 1)/2$   
  
  return ( $g_x, g_y$ ) ▷ Values for  $\frac{dL}{du}$   
end function
```

---

not exceed GPU capacity. While  $32 \times 32$  and  $16 \times 16$  both provide suitable metrics, we chose  $16 \times 16$  as slightly more accurate.

### 6.3. Initialization

In scenarios when we need fewer SfM points to initialize a small number of billboards, we subsample them with an iterative farthest point sampling strategy. For outdoor scenes, we optionally add 10K evenly distributed points on the large sphere using the Fibonacci algorithm [16] to represent the sky and far away objects. We select sphere radius as the distance from the scene center to the furthest SfM point to guarantee that all SfM points are included in the sphere. For scenarios when we use 20K points and less, we reduce the number of sphere points to 2K, and completely disable it when we use less than 10K points. In Figure 6, we provide a visualization of such a sphere.

---

**Algorithm 2** Billboards position optimization

---

```
Require:  $\frac{dL}{dI}$  ▷ Gradient of loss  $L$  w.r.t image  $I$   
Require:  $\mathbf{u}$  ▷ Plane intersection  $(u, v)$  point  
Require:  $\mathcal{B}$  ▷ Billboards sorted along the ray  
Require:  $\mathcal{T}$  ▷ Forward pass accumulated transparency  
  
  for  $i \in \mathcal{B}$  do  
    Sample alpha and color  
     $\alpha = T_i^\alpha[\mathbf{u}]$   
     $c = T_i^{\text{RGB}}[\mathbf{u}] + \text{SH}_i$   
     $\hat{c} = \alpha'c' + (1 - \alpha')c$  ▷ Accumulated color  
  
    Update transparency  
     $\mathcal{T} = \mathcal{T}/(1 - \alpha)$   
  
    Calculate gradients  
     $\frac{dL}{dc} = \alpha\mathcal{T}\frac{dL}{dI}$   
     $\frac{dL}{d\alpha} = (c - \hat{c})\mathcal{T}\frac{dL}{dI}$   
  
    Redistribute gradients  
     $\frac{dL}{du} = \text{BILINEAR}(\frac{dL}{dc}, \mathbf{u}, T_i^{\text{RGB}}, \frac{dL}{dT_i^{\text{RGB}}})$   
     $\frac{dL}{du} += \text{BILINEAR}(\frac{dL}{d\alpha}, \mathbf{u}, T_i^\alpha, \frac{dL}{dT_i^\alpha})$   
  
    Adjust position  
     $\frac{dL}{d\Sigma} = \mathcal{F}(\frac{dL}{du})$  ▷ Calculate  $\frac{dL}{d\Sigma}$  as in 2DGS  
  
     $\alpha' = \alpha$   
     $c' = c$   
  end for
```

---

## 7. Additional details on experiments and results

In this section, we provide more qualitative results for our method along with per-scene quantitative metrics for averaged values reported in the paper.

### 7.1. Visual results

In Figure 9, we provide an additional visual comparison of BBSplat with state-of-the-art NVS methods. Our renderings demonstrate exceeding quality.

In Figure 8, we demonstrate additional renderings with ray-tracing effects and extracted meshes for the DTU dataset.

Figure 7 demonstrates BBSplat training progress for 500, 5000, 15000, and 30000 iterations, showing the change of transparency from Gaussian distribution to arbitrary shapes.

### 7.2. Detailed results

In Table 9, we report scene-by-scene results on the experiments provided in Table 1. We demonstrate state-of-the-art metrics quality for the Mip-NeRF-360 dataset on the indoor scenes while falling shortly behind for the outdoor scenes.

|               | PSNR $\uparrow$ | L1 $\downarrow$ | LPIPS $\downarrow$ |
|---------------|-----------------|-----------------|--------------------|
| Texture-GS    | 30.03           | 0.0135          | 0.1440             |
| BBSplat(Ours) | 30.81           | 0.0123          | 0.1055             |

Table 8. **Comparison with Texture-GS [57] on DTU.** While Texture-GS also applies textures for Gaussians, it does not perform well for NVS.

This is caused by a huge number of small monochromatic details (*e.g.* leafs) that are more efficient to represent with Gaussian primitives. For the Tanks&Temples outdoor scenes and DTU indoor scenes, we provide the best NVS for all cases.

### 7.3. Comparison to Texture-GS

In Table 8, we compare with Texture-GS [57] as it also proposes to employ textures, although in conjunction with a 3DGS model. We report metrics only for the DTU dataset since Texture-GS is unable to process large scenes, as it is limited by spherical texture space definition.

### 7.4. Limitations and future work

One of the limitations of the proposed method is the NVS for the large outdoor scenes. While we provide high rendering quality for Tanks&Temples, there is still room for improvement in future works for the Mip-NeRF-360 dataset. Another limitation is training time, as it takes about 40 minutes to fit a scene, compared with 5 minutes for 3DGS. This slowdown is caused by backpropagation to the textures, and while it still significantly outperforms NeRF-based methods in terms of speed, it could be a bottleneck for some applications. Another limitation is that the use of a higher amount of primitives for outdoor scenes leads to over-fitting. In future works, we are going to focus on resolving these limitations.

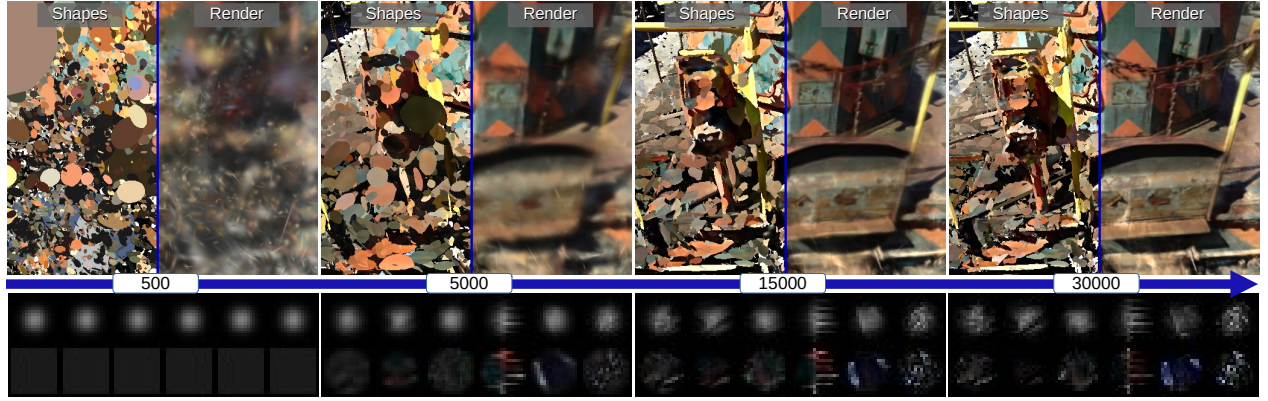

Figure 7. **BBSplat optimization process.** Top: We demonstrate billboard silhouettes and rendering results during the training process for 500, 5000, 15000, and 30000 iterations. To visualize silhouettes we disabled color textures and cut alpha-maps to the threshold. Bottom: We show examples of alpha-maps and RGB textures corresponding to training steps.

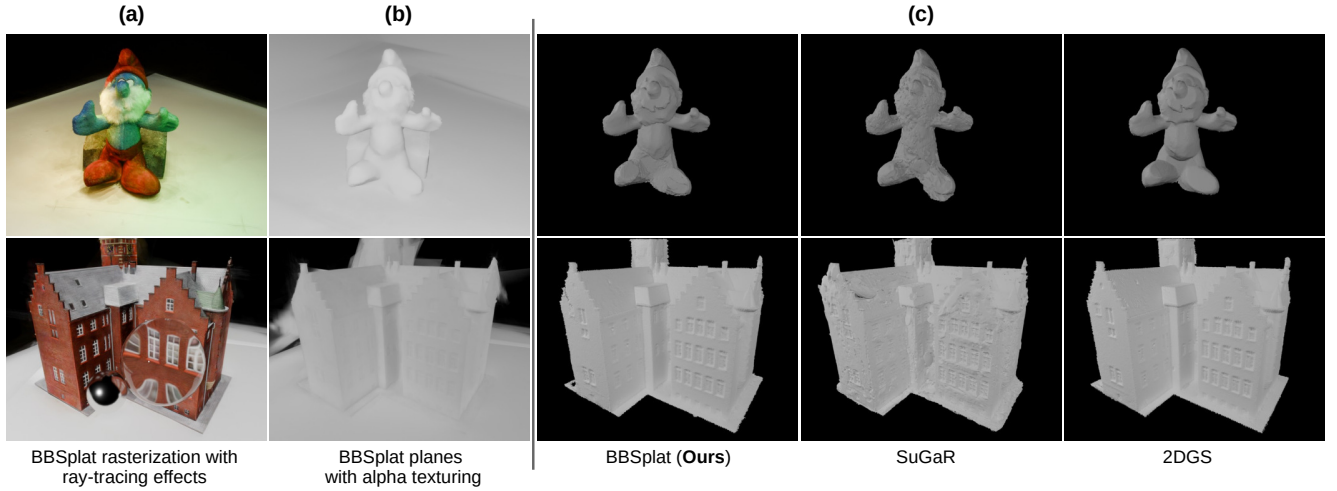

Figure 8. **Ray-tracing and mesh extraction.** a) BBSplat representation of the scene as explicit textured planes allows the implementation of ray-tracing effects during rasterization (*e.g.* relighting or mirror effects). BBSplat representation can be rasterized as splatting or with classic rasterization tools (*e.g.* Blender). b) Rasterization of planes with alpha texture provide accurate objects suitable for mesh extraction. c) Alternatively, our representation can be used to extract accurate 3D meshes, surpassing the accuracy of 3D Gaussians-based methods (*e.g.* SuGaR).

|               |            | 3DGS [24]              |          |          | 3DGS-MCMC [25]         |          |          | 2DGS <sup>†</sup> [20] |          |          | BBSplat (Ours)         |          |          |
|---------------|------------|------------------------|----------|----------|------------------------|----------|----------|------------------------|----------|----------|------------------------|----------|----------|
|               |            | PSNR↑ / SSIM↑ / LPIPS↓ |          |          | PSNR↑ / SSIM↑ / LPIPS↓ |          |          | PSNR↑ / SSIM↑ / LPIPS↓ |          |          | PSNR↑ / SSIM↑ / LPIPS↓ |          |          |
| Tanks&Temples | Train      | 19.81                  | / 0.7229 | / 0.3347 | 21.21                  | / 0.7522 | / 0.3120 | 19.35                  | / 0.7149 | / 0.3417 | 21.38                  | / 0.7702 | / 0.2604 |
|               | Truck      | 20.43                  | / 0.7511 | / 0.3192 | 23.91                  | / 0.8245 | / 0.2513 | 20.77                  | / 0.7479 | / 0.3283 | 24.19                  | / 0.8418 | / 0.1957 |
|               | Francis    | 24.16                  | / 0.8456 | / 0.3368 | 27.82                  | / 0.8813 | / 0.2964 | 22.61                  | / 0.8356 | / 0.3485 | 28.56                  | / 0.9079 | / 0.2334 |
|               | Horse      | 19.17                  | / 0.7831 | / 0.2973 | 24.93                  | / 0.8695 | / 0.2080 | 19.92                  | / 0.7775 | / 0.3116 | 24.72                  | / 0.8847 | / 0.1604 |
|               | Lighthouse | 20.93                  | / 0.8044 | / 0.2773 | 22.25                  | / 0.8163 | / 0.2668 | 21.45                  | / 0.8053 | / 0.2817 | 22.75                  | / 0.8332 | / 0.2214 |
| Mip-NeRF-360  | Room       | 29.24                  | / 0.8924 | / 0.2721 | 30.93                  | / 0.9056 | / 0.2541 | 29.76                  | / 0.8914 | / 0.2731 | 31.13                  | / 0.9146 | / 0.2150 |
|               | Kitchen    | 24.56                  | / 0.8712 | / 0.2129 | 29.16                  | / 0.9003 | / 0.1787 | 25.93                  | / 0.8745 | / 0.2095 | 30.35                  | / 0.9116 | / 0.1430 |
|               | Bonsai     | 25.47                  | / 0.8856 | / 0.2986 | 30.48                  | / 0.9230 | / 0.2447 | 26.24                  | / 0.8895 | / 0.2944 | 29.62                  | / 0.9085 | / 0.2334 |
|               | Counter    | 26.36                  | / 0.8716 | / 0.2628 | 28.28                  | / 0.8910 | / 0.2350 | 26.65                  | / 0.8701 | / 0.2649 | 28.30                  | / 0.8941 | / 0.2061 |
|               | Bicycle    | 23.04                  | / 0.5912 | / 0.4354 | 23.87                  | / 0.6675 | / 0.3652 | 22.74                  | / 0.5738 | / 0.4460 | 23.28                  | / 0.6520 | / 0.3096 |
|               | Garden     | 23.98                  | / 0.7093 | / 0.3400 | 25.06                  | / 0.7512 | / 0.2974 | 24.26                  | / 0.7053 | / 0.3419 | 25.75                  | / 0.7873 | / 0.1907 |
| DTU           | Stump      | 24.08                  | / 0.6387 | / 0.4035 | 25.82                  | / 0.7201 | / 0.3311 | 24.05                  | / 0.6399 | / 0.4047 | 24.00                  | / 0.6547 | / 0.3376 |
|               | Scan24     | 22.09                  | / 0.8450 | / 0.2590 | 27.19                  | / 0.8745 | / 0.2319 | 21.83                  | / 0.8423 | / 0.2681 | 27.47                  | / 0.8850 | / 0.1677 |
|               | Scan37     | 20.01                  | / 0.8097 | / 0.2942 | 24.18                  | / 0.8449 | / 0.2673 | 20.83                  | / 0.8187 | / 0.2881 | 24.93                  | / 0.8670 | / 0.2127 |
|               | Scan40     | 19.21                  | / 0.7676 | / 0.3535 | 22.46                  | / 0.8132 | / 0.3196 | 20.47                  | / 0.7717 | / 0.3493 | 25.56                  | / 0.8709 | / 0.2081 |
|               | Scan55     | 25.25                  | / 0.7934 | / 0.3831 | 27.88                  | / 0.8221 | / 0.3775 | 25.67                  | / 0.7959 | / 0.3857 | 27.74                  | / 0.8511 | / 0.2746 |
|               | Scan63     | 23.91                  | / 0.9098 | / 0.2156 | 31.08                  | / 0.9411 | / 0.1792 | 30.11                  | / 0.9228 | / 0.1963 | 30.32                  | / 0.9422 | / 0.1652 |
|               | Scan65     | 27.76                  | / 0.8476 | / 0.3648 | 29.41                  | / 0.8585 | / 0.3605 | 29.32                  | / 0.8513 | / 0.3688 | 29.67                  | / 0.8754 | / 0.2803 |
|               | Scan69     | 26.20                  | / 0.8485 | / 0.3545 | 26.97                  | / 0.8592 | / 0.3483 | 26.34                  | / 0.8465 | / 0.3576 | 26.71                  | / 0.8660 | / 0.2845 |
|               | Scan83     | 28.36                  | / 0.8629 | / 0.3888 | 29.62                  | / 0.8679 | / 0.3818 | 28.69                  | / 0.8590 | / 0.3921 | 28.97                  | / 0.8685 | / 0.3604 |
|               | Scan97     | 22.90                  | / 0.8263 | / 0.3762 | 27.67                  | / 0.8588 | / 0.3478 | 24.45                  | / 0.8360 | / 0.3673 | 27.39                  | / 0.8579 | / 0.3268 |
|               | Scan105    | 24.58                  | / 0.8429 | / 0.3781 | 30.10                  | / 0.8687 | / 0.3579 | 23.92                  | / 0.8362 | / 0.3797 | 29.35                  | / 0.8765 | / 0.3154 |
|               | Scan106    | 30.46                  | / 0.8780 | / 0.3632 | 33.38                  | / 0.8983 | / 0.3455 | 30.39                  | / 0.8723 | / 0.3629 | 32.93                  | / 0.9020 | / 0.3133 |
|               | Scan110    | 30.71                  | / 0.8779 | / 0.3773 | 31.55                  | / 0.8898 | / 0.3666 | 31.12                  | / 0.8806 | / 0.3771 | 31.42                  | / 0.8798 | / 0.3324 |
|               | Scan114    | 28.58                  | / 0.8642 | / 0.3540 | 29.82                  | / 0.8807 | / 0.3462 | 28.65                  | / 0.8636 | / 0.3547 | 29.72                  | / 0.8870 | / 0.2976 |
|               | Scan118    | 31.77                  | / 0.8856 | / 0.3561 | 34.06                  | / 0.9010 | / 0.3482 | 32.49                  | / 0.8886 | / 0.3572 | 34.41                  | / 0.9090 | / 0.3077 |
|               | Scan122    | 29.83                  | / 0.8640 | / 0.3603 | 34.19                  | / 0.8949 | / 0.3459 | 33.52                  | / 0.8956 | / 0.3521 | 34.41                  | / 0.9069 | / 0.3092 |

Table 9. **Quantitative metrics for all scenes.** We report PSNR, SSIM, and LPIPS for each scene in all three datasets: Tanks&Temples [27], Mip-NeRF-360 [5], and DTU [23]. For comparison, we provide metrics for basic 3DGS [24] and 2DGS [20] methods, and for 3DGS-MCMC [25] as the best-scoring competitor.



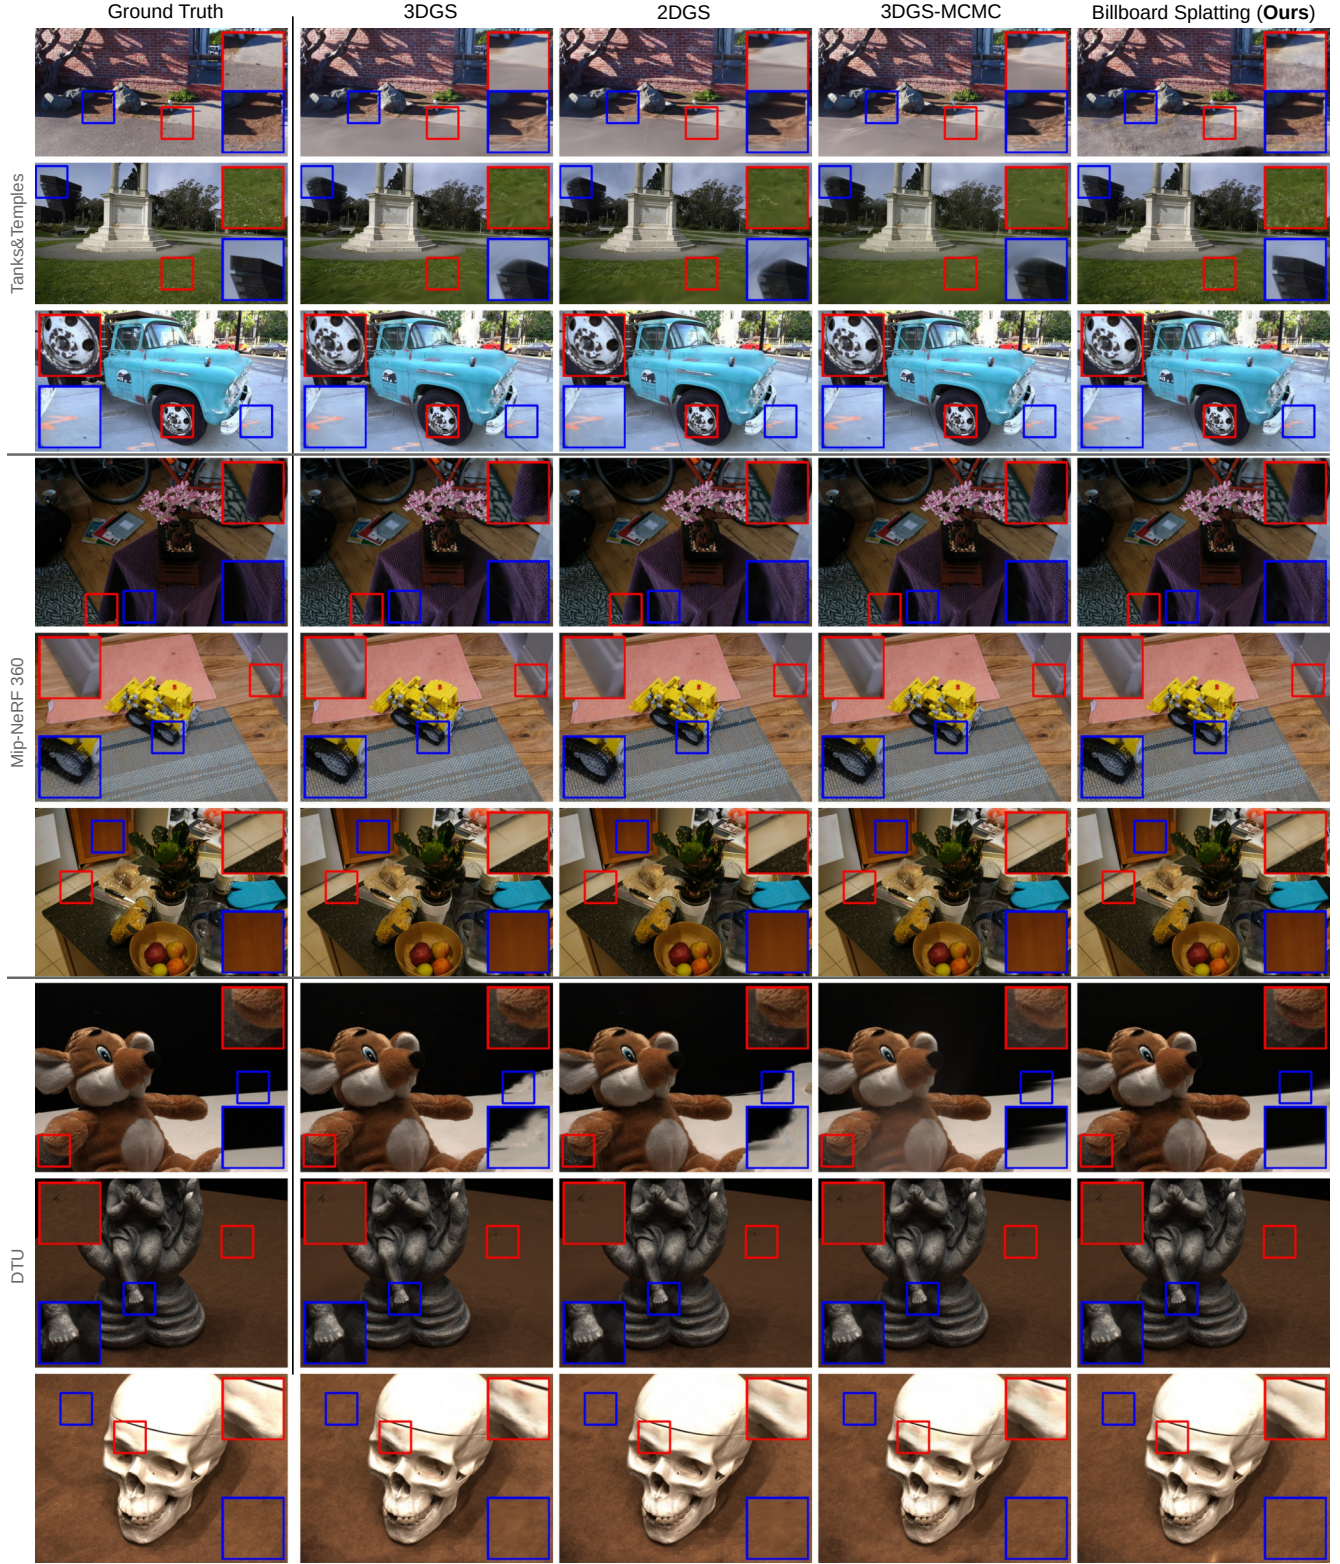

Figure 9. **Qualitative results.** We provide rendering results of three more scenes from each dataset: Tanks&Temples [Lighthouse, Francis, Truck], Mip-NeRF-360 [Bansai, Kitchen, Counter], and DTU [Scan105, Scan118, Scan65]. For competitors, we use the maximum number of Gaussians recommended by the method.
